# Supplementary material
Source: PubMed Central journal article supplement (PMC5592164)
Supplement: NIHMS893054-supplement-Supplementary_Information_1.pdf [file NIHMS893054-supplement-Supplementary_Information_1.pdf]

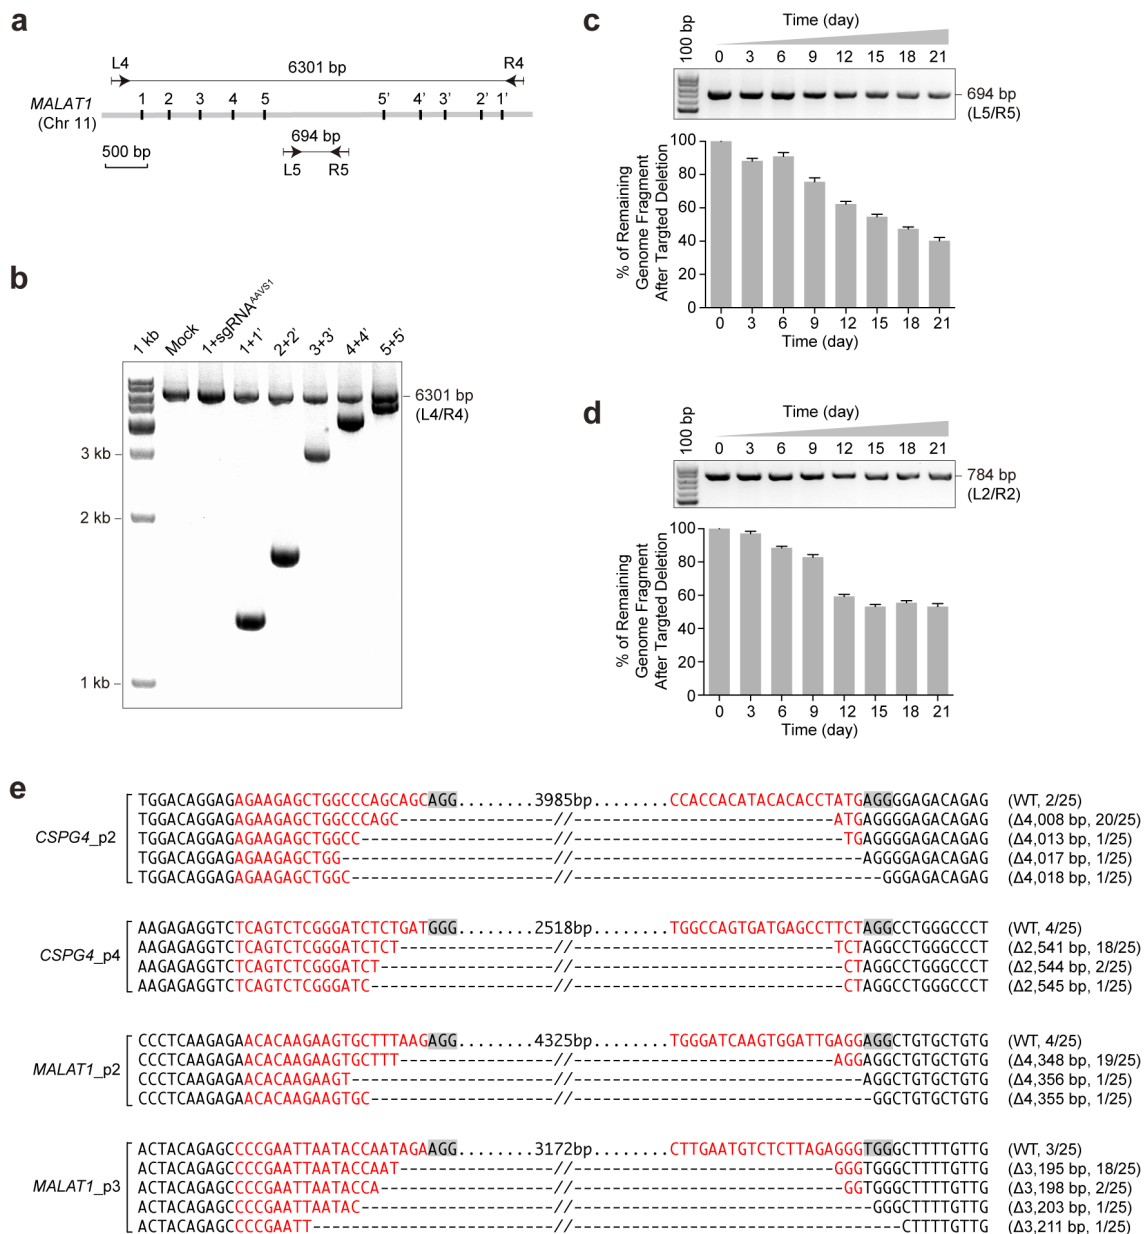

### Supplementary Figure 1

Large-fragment deletions induced by lentivirally-delivered pgRNAs.

(a,b) Five pairs of gRNAs targeting the *MALAT1* gene with respective U6 promoters (U6<sub>2</sub>) inducing a large-fragment deletion ranging around 1–5 kb were chosen and primers L4/R4 were used for the genomic PCR reactions. All infected Huh7.5<sub>OC</sub> cells were enriched by

FACS and incubated for 6 days. The control is a pair of gRNAs with one targeting the *MALAT1* locus and the other targeting AAVS1 region. (c) Quantification for the efficiency of large-fragment deletions on *MALAT1* locus using genomic PCR over the course of time post transduction. The pgRNAs (2+2' in **Supplementary Fig. 1b**, generating 4.3 kb deletion by design) were delivered into Huh7.5<sub>OC</sub> cells through lentiviral infection, and genomic DNA was extracted from different time points as indicated. The primers L5/R5 corresponding to sequences flanking pgRNA targeting sites were used for quantification. (d) Quantification for the efficiency of large-fragment deletions on *CSPG4* locus using genomic PCR over the course of time post transduction. The pgRNAs (2+2' in **Fig. 1c**, generating 4.0 kb deletion by design) were delivered into Huh7.5<sub>OC</sub> cells through lentiviral infection, and genomic DNA was extracted from different time points as indicated. The primers L2/R2 corresponding to sequences flanking pgRNA targeting sites were used for quantification, and primers L3/R3 corresponding to sequences farther away from the targeting sites were used for normalization. All primer sequences are listed in **Supplementary Table 11**. Images were analyzed by ImageJ software and data are presented as the mean  $\pm$  s.d. (n = 3). (e) DNA sequencing analysis of large-fragment deletion induced by two *CSPG4*-targeting pgRNAs (p2 and p4 stand for 2+2' and 4+4', respectively) in **Fig. 1d** and two *MALAT1*-targeting pgRNAs (p2 and p3 stand for 2+2' and 3+3', respectively) in **Supplementary Fig. 1c** from pooled cells 3 weeks post infection. Partial sequences of targeted gene in the genome containing the two gRNAs' targeting regions are labelled in red and the shaded nucleotides represent the PAM sequences. The dashes indicate deletions.

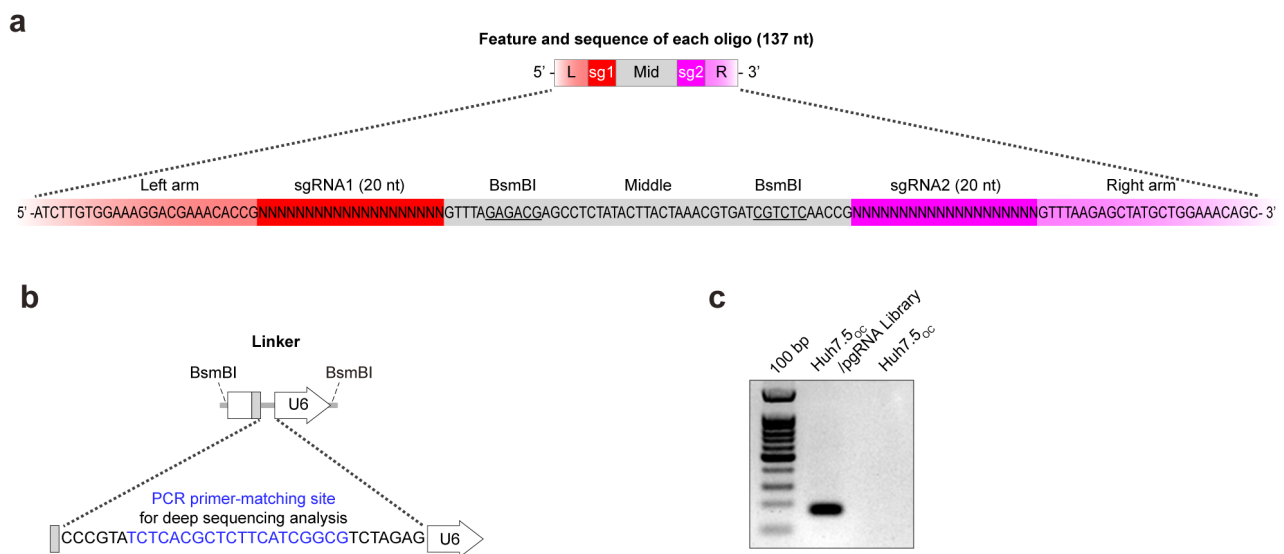

## Supplementary Figure 2

DNA sequences of designed oligo and linker between the two gRNAs of each pair, and PCR amplification of the barcode-gRNA region from the pgRNA library for deep-sequencing analysis, as indicated by electrophoresis.

(a) Feature and sequences of each oligo. The left arm and right arm are used for primer targeting for amplification. (b) Feature of the linker for the construction of pgRNA plasmid and its unique sequence between the end of first gRNA scaffold and the beginning of the second U6 promoter. (c) The genomic DNAs isolated from Huh7.5<sub>OC</sub> library and wild-type cells were used as templates for PCR amplification.

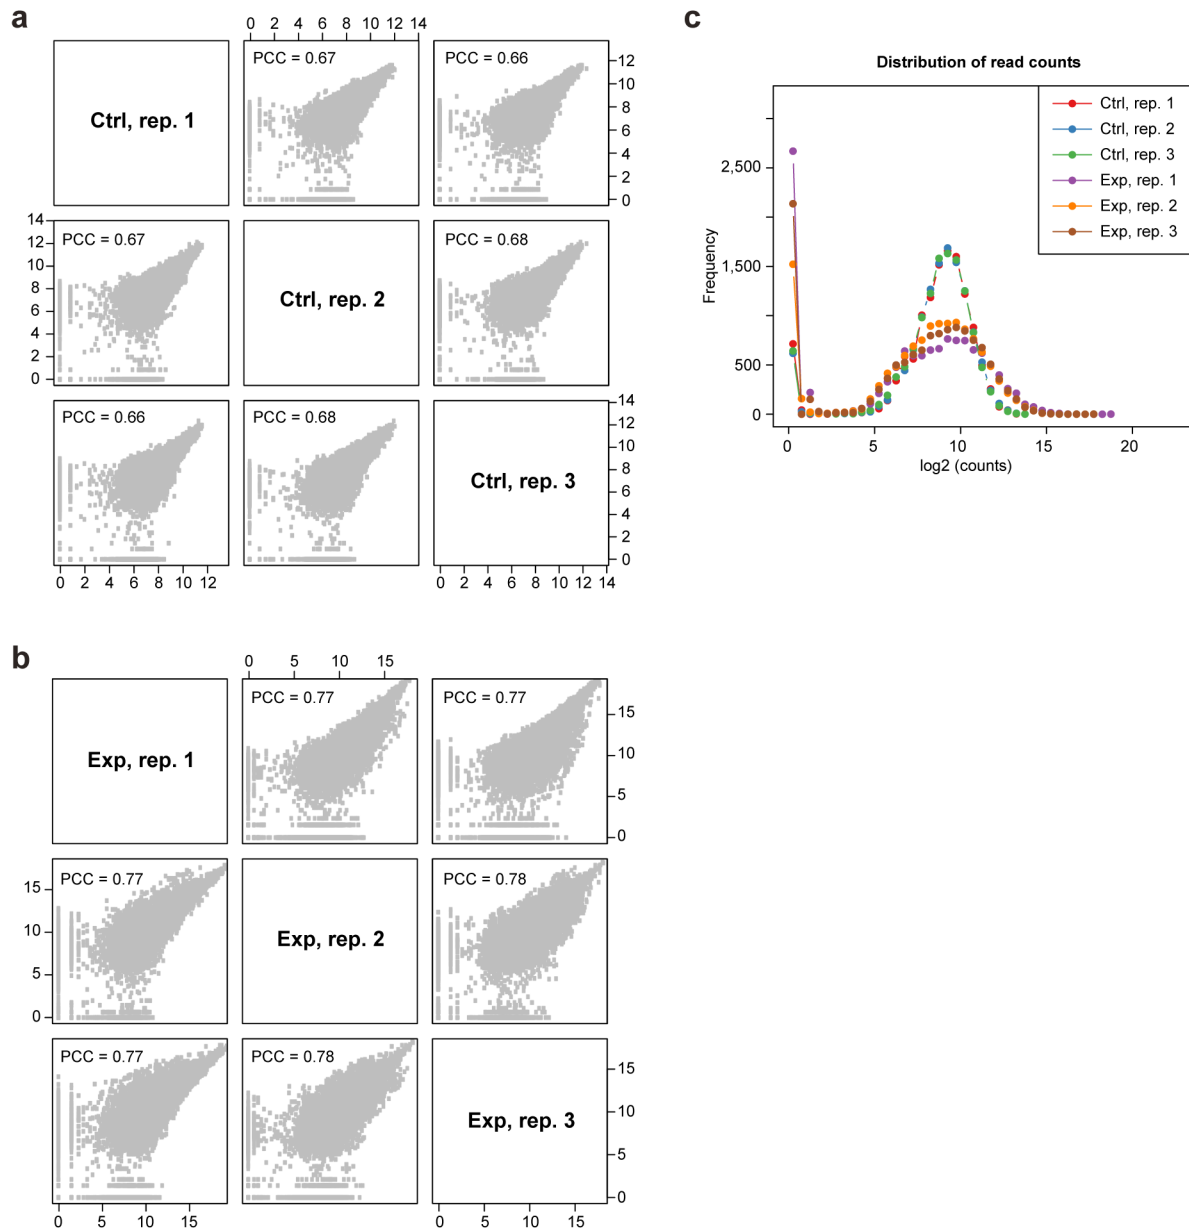

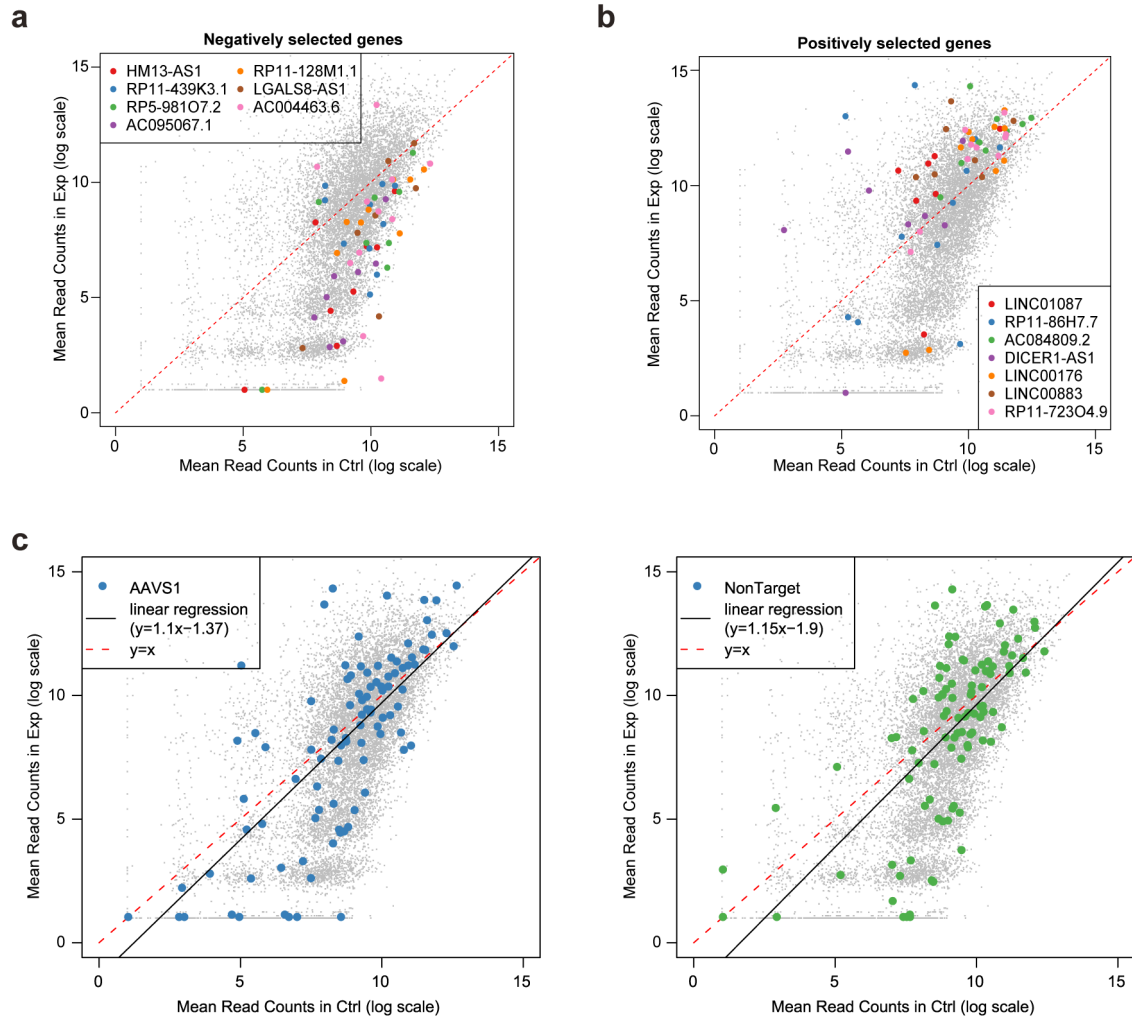

### Supplementary Figure 4

The mean read counts of pgRNAs targeting top negatively selected lncRNAs (**a**) and positively selected lncRNAs (**b**). (**c**) The mean read counts of pgRNAs targeting the AAVS1 loci (left) and non-targeting controls (right).

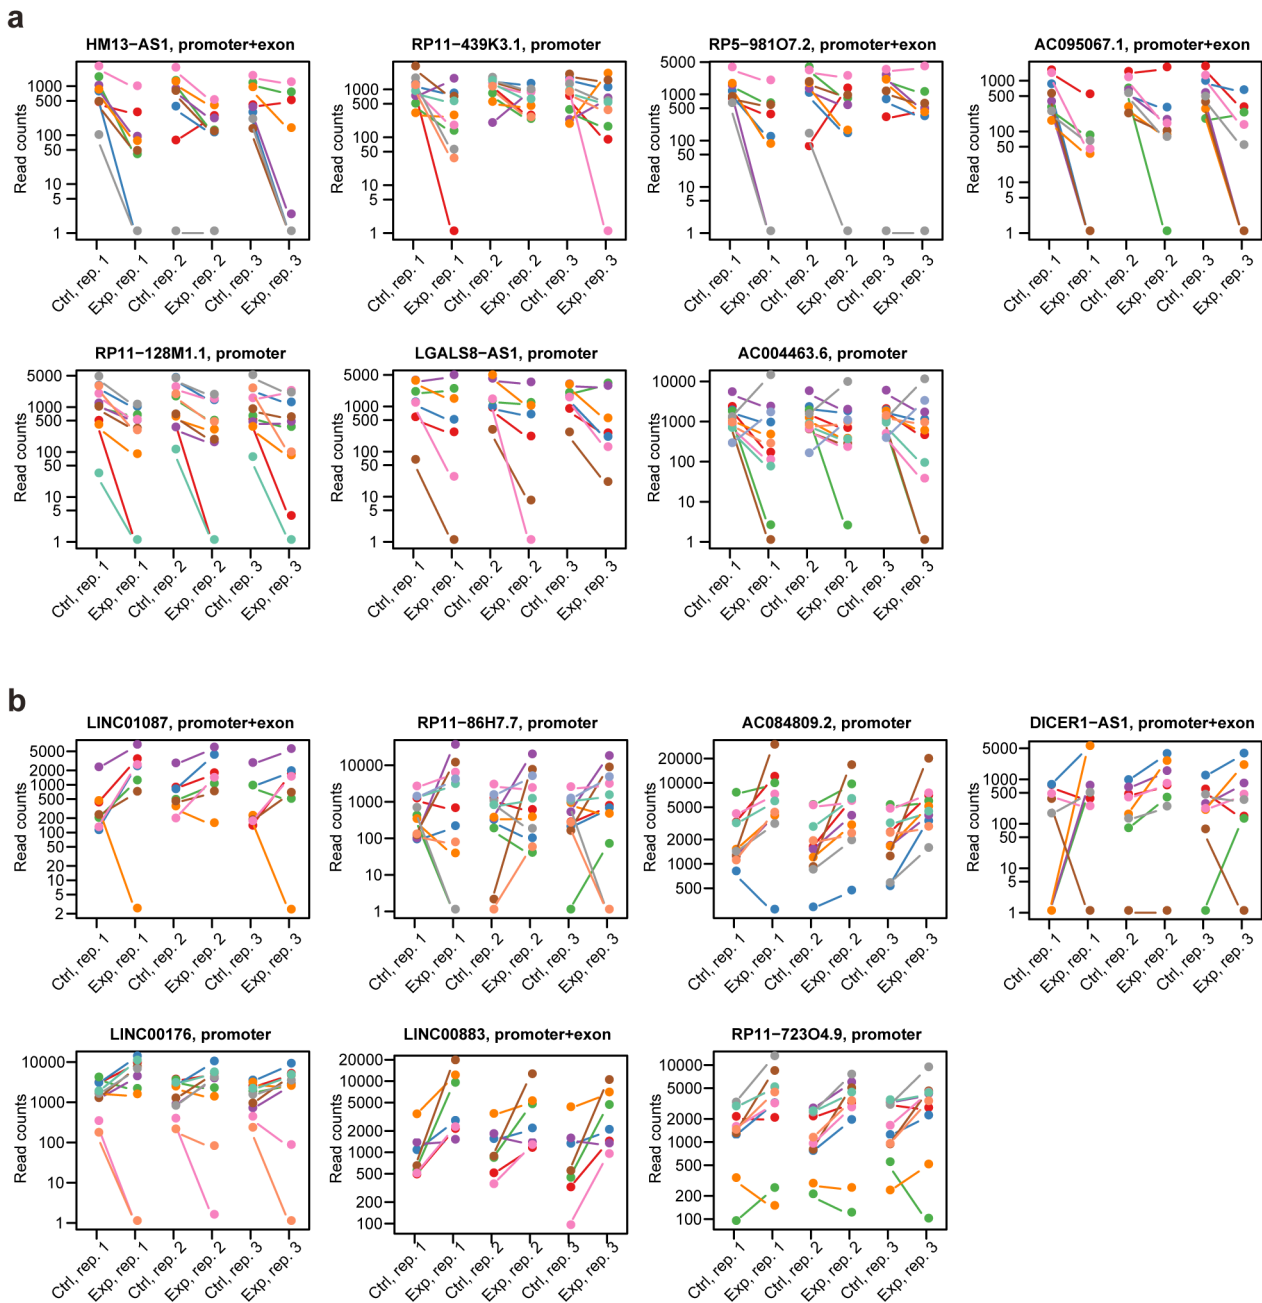

**Supplementary Figure 5**

The pgRNA read counts of negatively (a) and positively (b) selected lncRNAs chosen for validation.

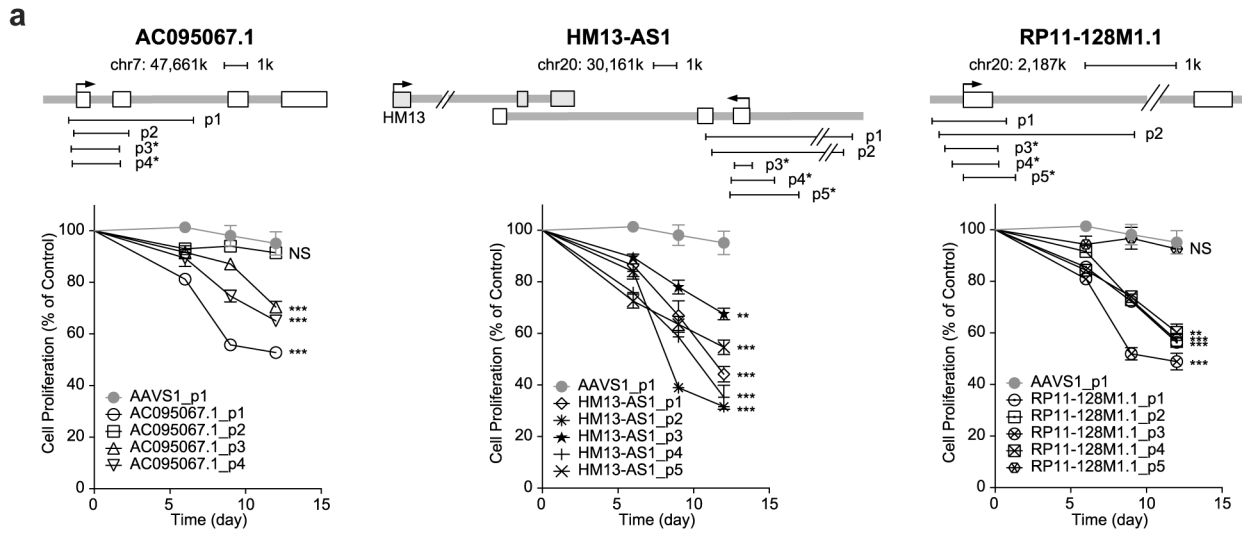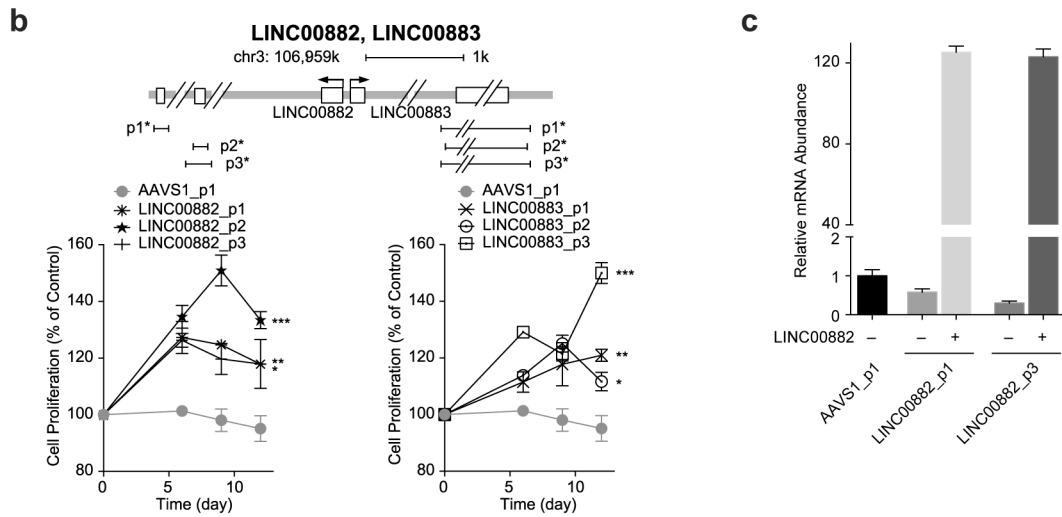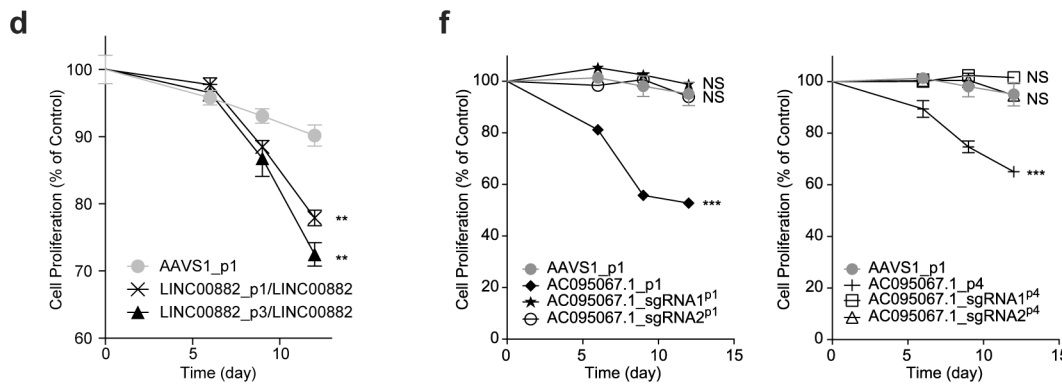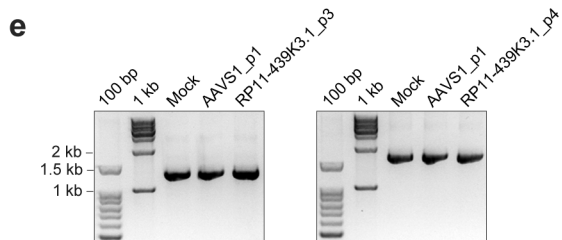

**Supplementary Figure 6**

Genetic validation of candidate lncRNAs in Huh7.5 cells and genomic deletions induced by RP11-439K3.1 targeting pgRNAs.

(a) Effects of large-fragment deletions of negatively selected lncRNAs on cell proliferation in Huh7.5<sub>OC</sub> cells. (b) Effects of large-fragment deletions of positively selected lncRNAs on cell proliferation in Huh7.5<sub>OC</sub> cells. (c) The LINC00882 mRNA levels (normalized to *GAPDH*) of pooled Huh7.5<sub>OC</sub> cells containing indicated LINC00882-targeting pgRNAs, with (+) or without (–) the ectopic expression of LINC00882. All primers used for quantitative PCR are listed in **Supplementary Table 12**. (d) Effects of the ectopic expression of LINC00882 on cell proliferation in pooled Huh7.5<sub>OC</sub> cells containing indicated LINC00882-targeting pgRNAs. Data are presented as the mean  $\pm$  s.d. (n = 3). *P* values are calculated using Student's t test and are corrected for multiple comparison using Benjamini Hochberg procedure, \*\**P* < 0.01. (e) RP11-439K3.1\_p3 and RP11-439K3.1\_p4 were delivered into Huh7.5<sub>OC</sub> cells through lentivirus and the deletions were assayed by genomic PCR. (f) Effects of sgRNA and pgRNAs targeting negatively selected lncRNAs as indicated on cell proliferation in Huh7.5<sub>OC</sub> cells. Cell proliferation was determined the same as described in **Fig. 4**. The newly designed pairs different from those used in the original library are marked as asterisk (\*) for this and the rest figures. The arrows indicate the transcriptional starting sites. Open and shaded boxes refer to exons of non-coding and coding genes, respectively. Data are presented as the mean  $\pm$  s.d. (n = 3). *P* values are calculated using Student's t test and are corrected for multiple comparison using Benjamini Hochberg procedure, \**P* < 0.05; \*\**P* < 0.01; \*\*\**P* < 0.001; NS, not significant.



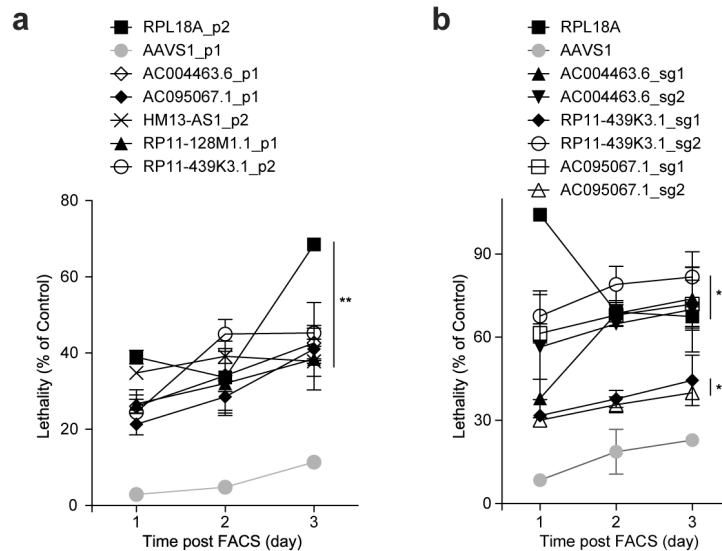

### Supplementary Figure 7

Relative cell viability for Huh7.5 cells transduced with indicated pgRNA constructs and transcriptional repression.

Effects of large-fragment deletions (**a**) and transcriptional repression (**b**) of negatively selected lncRNAs on cell viability in Huh7.5<sub>OC</sub> cells. All the pgRNAs and sgRNAs were delivered into Huh7.5<sub>OC</sub> cells through lentiviral infection. The cells were conducted with FACS enrichment 72 h after infection, and the LDH lethality assay were performed from 1-3 days post FACS. Data are presented as the mean  $\pm$  s.d. ( $n = 3$ ).  $P$  values are calculated using Student's  $t$  test and are corrected for multiple comparison using Benjamini Hochberg procedure, \* $P < 0.05$ ; \*\* $P < 0.01$ .

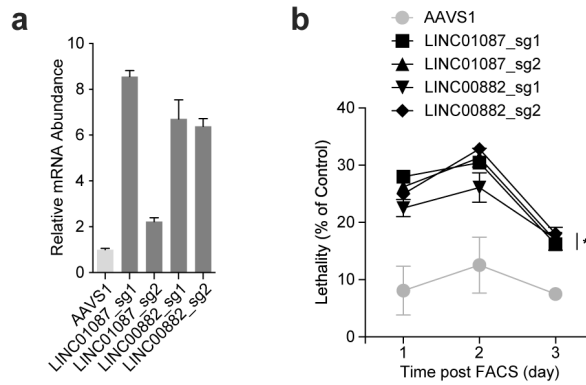

### Supplementary Figure 8

Effects of transcriptional activation of positively selected lncRNAs on cell viability.

(a) LINC01087 and LINC00882 mRNA levels (normalized to *GAPDH*) were quantified. All primers used for quantitative PCR are listed in **Supplementary Table 12**. (b) All the sgRNAs were delivered into Huh7.5 cells through transient transfection. The cells were conducted with FACS enrichment 72 h after transfection, and the LDH lethality assay were performed from 1-3 days post FACS. Data are presented as the mean  $\pm$  s.d. ( $n = 3$ ).  $P$  values are calculated using Student's  $t$  test and are corrected for multiple comparison using Benjamini Hochberg procedure,  $*P < 0.05$ .

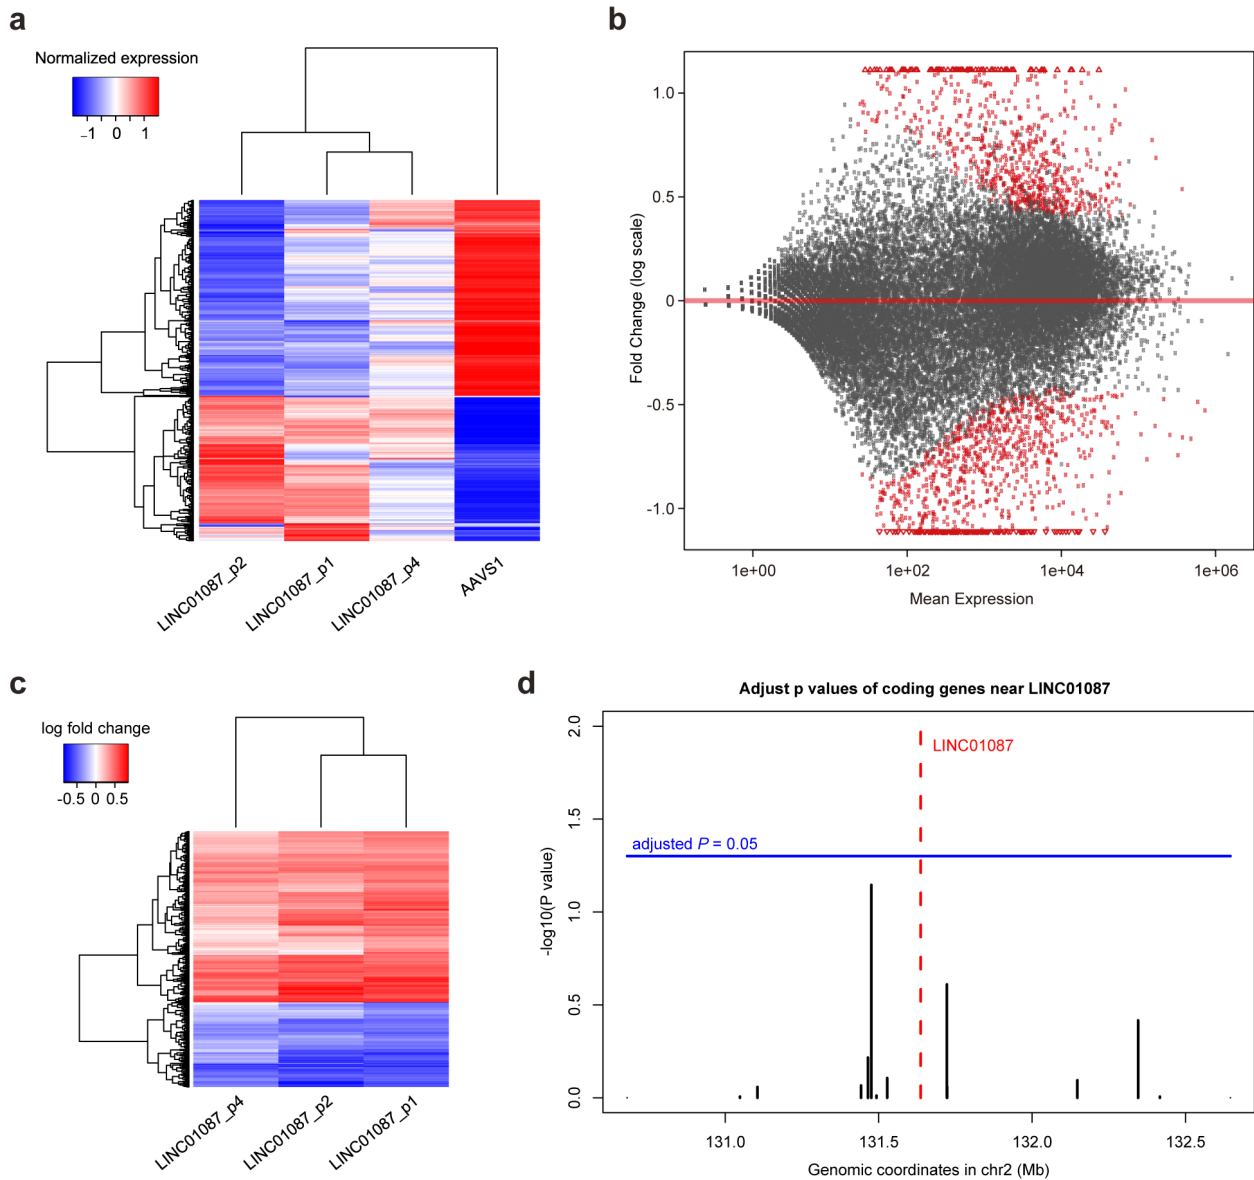

## Supplementary Figure 9

RNA-seq profiling of cells knocking out LINC01087, one positively selected lncRNA in the screen and the effect of knocking out LINC01087 on the expressions of nearby coding genes.

(a) Hierarchical clustering of the expressions of 500 genes showing the highest variance across samples. (b) The mean expression and log fold change (MA plot) of all genes (grey dots), and differentially expressed genes (red dots) detected using DESeq2. (c) Comparison of differentially expressed genes between three knockout samples. Genes that are differentially expressed (defined as log fold change  $> 0.5$  or  $< -0.5$ ) in at least one

sample are selected, and their log fold changes across all samples are shown. The majority of these genes (99%) are consistently up-regulated (or down-regulated) in all three samples. **(d)** For each coding gene proximal to LINC01087 (distance <1 Mbp), the genomic location and the corresponding differential expression statistics (adjusted *P* value) is reported.

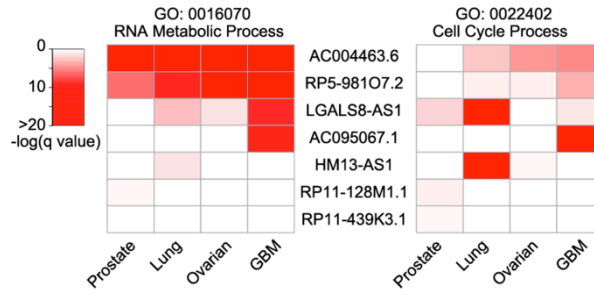

### Supplementary Figure 10

In different cancer types, genes that are co-expressed with top negatively selected.

lncRNAs are enriched in RNA metabolic process and cell cycle process.

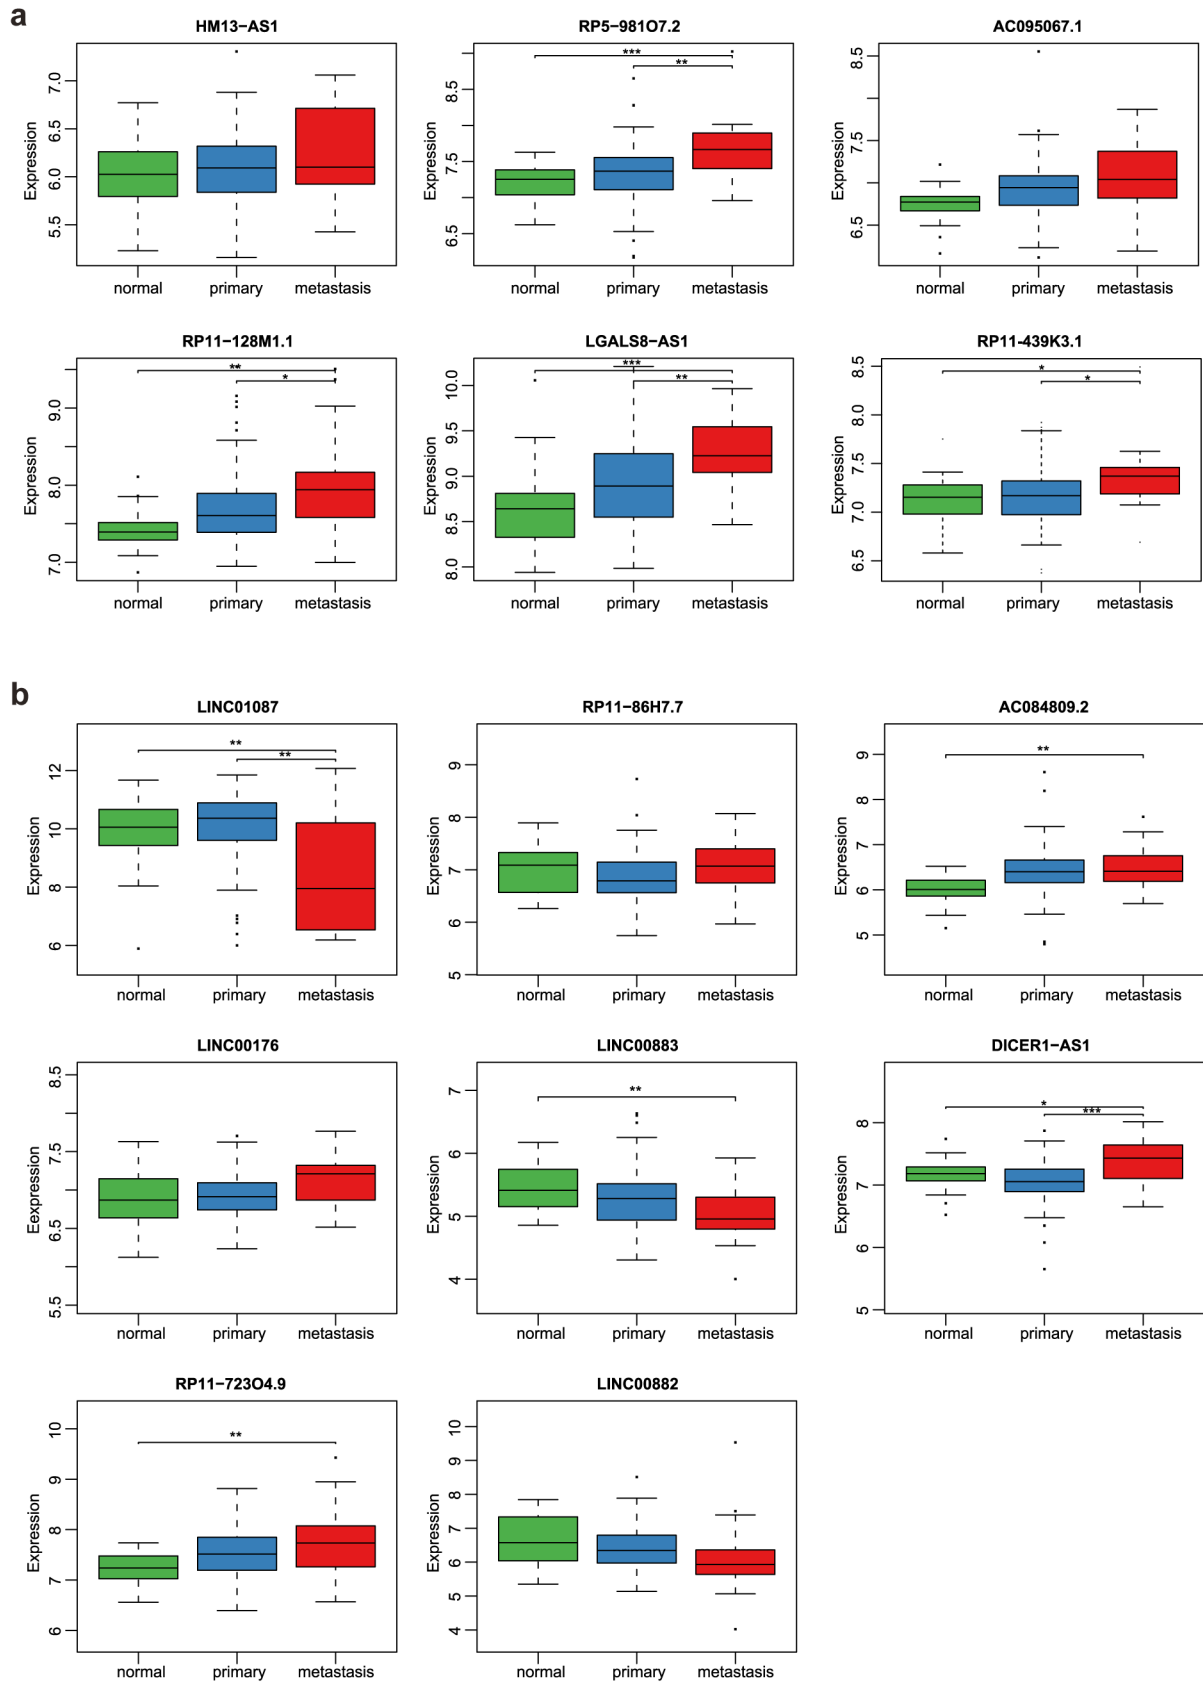

**Supplementary Figure 11**

The expression distribution of top negatively (**a**) and top positively (**b**) selected lncRNAs in different stages of prostate cancer. \* $P < 0.05$ ; \*\* $P < 0.01$ ; \*\*\* $P < 0.001$ , Student's t test.

Center lines represent median values; box limits represent the interquartile range; whiskers extend each 1.5 times the interquartile range; dots represent outliers.

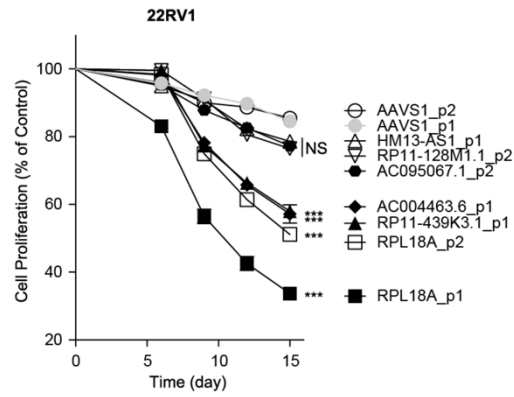

### Supplementary Figure 12

Effects of genomic deletion of the negatively selected lncRNAs on cell proliferation in 22RV1, an advanced stage prostate cancer cell line.

Data are presented as the mean  $\pm$  s.d. ( $n = 2$ ).  $P$  values are calculated using Student's  $t$  test and are corrected for multiple comparison using Benjamini Hochberg procedure,  $*P < 0.05$ ;  $**P < 0.01$ ;  $***P < 0.001$ ; NS, not significant.



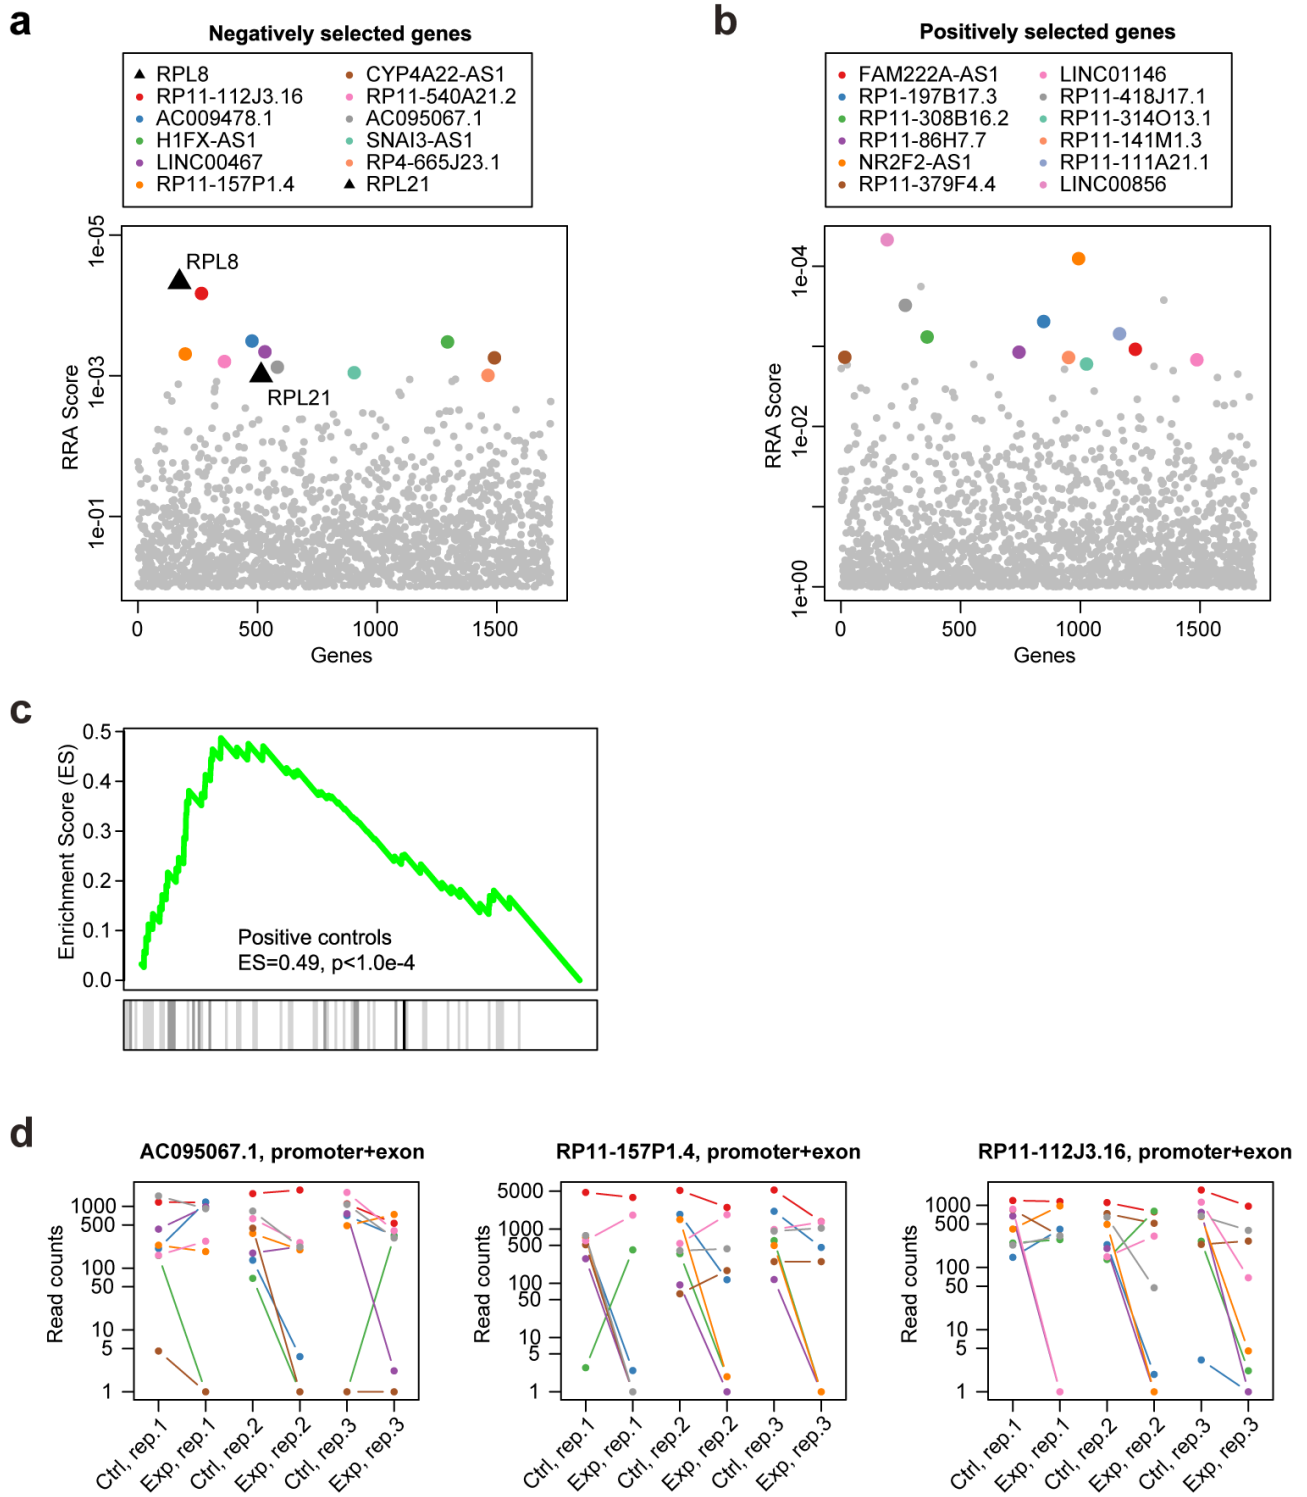

**Supplementary Figure 13**

The lncRNA screening in HeLa cell line.

**(a)** The Robust Rank Aggregation (RRA) scores of top ranked negatively selected lncRNAs (marked as dots) and positive control genes (marked as triangles) in HeLa screen. **(b)** The Robust Rank Aggregation (RRA) scores of top ranked positively selected in HeLa screen. **(c)** Essential genes served as positive controls are enriched in negative selections of HeLa screen, using Gene Set Enrichment Analysis (GSEA). The degree of enrichment is measured as Enrichment Score (ES), a measurement of over-representation of a gene set commonly used in the Gene-Set Enrichment Analysis (GSEA). **(d)** The sgRNA read counts of some negatively selected lncRNAs in HeLa screen.

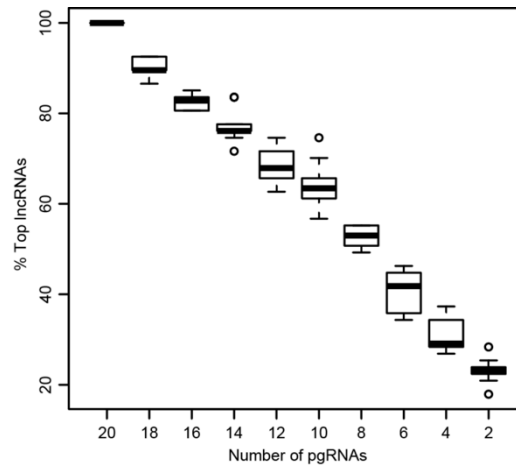

### Supplementary Figure 14

The sensitivity of lncRNA screening library in terms of the number of pgRNAs targeting each lncRNA.

For sensitivity evaluation, we use lncRNAs that are ranked top 10% using 20 pgRNAs/lncRNA as “gold standard”, and randomly down-sample the number of pgRNAs for each lncRNA. The percentage of “gold standard” lncRNAs that are still ranked on top 10% is reported. For each number of pgRNAs, 10 independent sampling processes are performed and the distribution of the percentage is reported. Center lines represent median values; box limits represent the interquartile range; whiskers extend each 1.5 times the interquartile range; dots represent outliers.

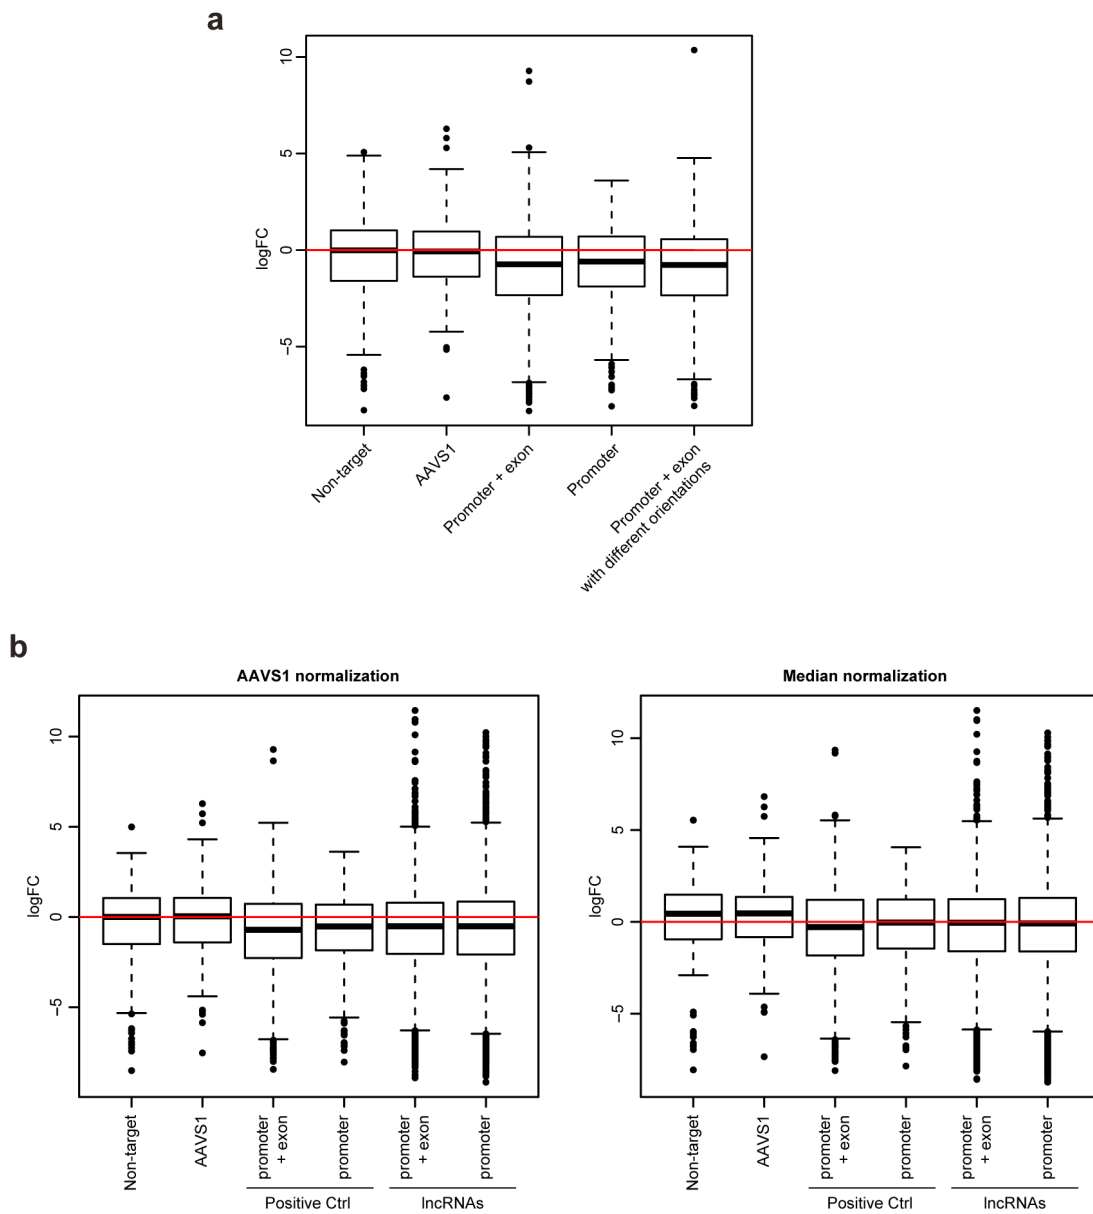

### Supplementary Figure 15

The effect of sgRNA orientation on phenotype and effects of different normalization methods.

(a) The distributions of log fold changes of pgRNAs targeting the promoters and exons of positive control genes are shown. These pgRNAs have at least one sgRNA with different orientation compared with the orientation of the target gene. The log fold changes of pgRNAs with the same orientation as target genes are also reported as a reference. (b) The distributions of log fold changes of pgRNAs with different groups are shown. Two

different normalization methods are used: AAVS1 normalization (used in the current study) and median normalization, which is a default normalization method for MAGeCK algorithm. Using AAVS1 normalization, the median log fold change of AAVS1 targeting pgRNAs and non-targeting pgRNAs is 0, while median normalization will have non-zero median log fold change. Center lines represent median values; box limits represent the interquartile range; whiskers extend each 1.5 times the interquartile range; dots represent outliers.

## Supplementary Tables

**Supplementary Table 1** | Design and sequences of paired gRNAs (pgRNAs) targeting *CSPG4* for deletion of DNA fragments

**Supplementary Table 2** | Design and sequences of paired gRNAs (pgRNAs) targeting *MALAT1* for deletion of DNA fragments

**Supplementary Table 3** | Summary of the pgRNA library for functional screening

**Supplementary Table 4** | Qualitative summary of the pgRNA library

**Supplementary Table 5** | MAGeCK results of negatively and positively selected lncRNAs in Huh7.5 cell line

**Supplementary Table 6** | pgRNA design for functional validation of selected lncRNAs

**Supplementary Table 7** | sgRNA design of CRISPR-inhibitor and CRISPR-activator for functional validation of selected lncRNAs

**Supplementary Table 8** | The Gene Ontology (GO) enrichment results of genes that are correlated with top lncRNA hits in liver cancer cell lines

**Supplementary Table 9** | MAGeCK results of negatively and positively selected lncRNAs in HeLa cell line

**Supplementary Table 10** | Oligos for the pgRNA library construction, the read counts of control and treatment samples, and the locations of targeting lncRNAs

**Supplementary Table 11** | Primers used for PCR amplification of the genomic DNAs and library construction

**Supplementary Table 12** | Primers for Quantitative PCR

**Supplementary Table 1.** Design and sequences of paired gRNAs (pgRNAs) targeting *CSPG4* for deletion of DNA fragments.

| Items | pgRNAs <sup>CSPG4</sup> | Predicted Size of Deletion (kb) | Predicted Size of Genome PCR using Primers L1/R1 (kb) |
|-------|-------------------------|---------------------------------|-------------------------------------------------------|
| 1     | sgRNA1/sgRNA1'          | 4.531                           | 0.392                                                 |
| 2     | sgRNA2/sgRNA2'          | 4.008                           | 0.915                                                 |
| 3     | sgRNA3/sgRNA3'          | 3.476                           | 1.447                                                 |
| 4     | sgRNA4/sgRNA4'          | 2.541                           | 2.382                                                 |
| 5     | sgRNA5/sgRNA5'          | 2.035                           | 2.888                                                 |
| 6     | sgRNA6/sgRNA6'          | 1.967                           | 2.956                                                 |

| sgRNA <sup>CSPG4</sup> | Sequence                |
|------------------------|-------------------------|
| sgRNA1                 | 5'-AGGAGACTGGAGGTAAGACA |
| sgRNA1'                | 5'-TCACTCCTGTGCACAGCAGC |
| sgRNA2                 | 5'-AGAAGAGCTGGCCCAGCAGC |
| sgRNA2'                | 5'-CCACCACATACACACCTATG |
| sgRNA3                 | 5'-AGTCTAGTGAGACGGAGGCG |
| sgRNA3'                | 5'-TGCTGGGAGGAGGTTTGAGA |
| sgRNA4                 | 5'-TCAGTCTCGGGATCTCTGAT |
| sgRNA4'                | 5'-TGGCCAGTGATGAGCCTTCT |
| sgRNA5                 | 5'-GTGCTGGGACTTGCTGTGGT |
| sgRNA5'                | 5'-CAGAAAGGCAACTAAACAGA |
| sgRNA6                 | 5'-ACACCTCTTGCCAGTCTGCT |
| sgRNA6'                | 5'-GTTGTAAGCTCCATGGGATT |
| sgRNA <sup>AAVS1</sup> | 5'-CGGAACCTGAAGGAGGCGGC |

**Supplementary Table 2.** Design and sequences of paired gRNAs (pgRNAs) targeting *MALAT1* for deletion of DNA fragments.

| Items | pgRNAs <sup>MALAT1</sup> | Predicted Size of Deletion (kb) | Predicted Size of Genome PCR using Primers L1/R1 (kb) |
|-------|--------------------------|---------------------------------|-------------------------------------------------------|
| 1     | sgRNA1/sgRNA1'           | 5.022                           | 1.279                                                 |
| 2     | sgRNA2/sgRNA2'           | 4.348                           | 1.953                                                 |
| 3     | sgRNA3/sgRNA3'           | 3.195                           | 3.106                                                 |
| 4     | sgRNA4/sgRNA4'           | 2.012                           | 4.289                                                 |
| 5     | sgRNA5/sgRNA5'           | 0.995                           | 5.306                                                 |

| sgRNA <sup>MALAT1</sup> | Sequence                  |
|-------------------------|---------------------------|
| sgRNA1                  | 5'- CCGCAGATCAGAGTGGGCCAC |
| sgRNA1'                 | 5'- GGATAGTACACTTCACTCAG  |
| sgRNA2                  | 5'- ACACAAGAAGTGCTTTAAG   |
| sgRNA2'                 | 5'- GGGATCAAGTGGATTGAGG   |
| sgRNA3                  | 5'- CCCGAATTAATACCAATAGA  |
| sgRNA3'                 | 5'- CTTGAATGTCTCTTAGAGGG  |
| sgRNA4                  | 5'- CCCATCAATTTAATTTCTGG  |
| sgRNA4'                 | 5'- CCAGTTTGAATTGGGAAGCT  |
| sgRNA5                  | 5'- GAGCCAGTGCGATTTGGTGA  |
| sgRNA5'                 | 5'- GGTCTTAACAGGGAAGAGAG  |



**Supplementary Table 3.** Summary of pgRNA library for functional screening.

| Positive controls                 |          | Negative controls                                     |     | lncRNA targets                    |          |
|-----------------------------------|----------|-------------------------------------------------------|-----|-----------------------------------|----------|
| Genes                             | 20       | Non-targeting                                         | 100 | lncRNA                            | 671      |
| Pairs targeting promoters         | ~20/gene | Pairs targeting AAVS1 loci                            | 100 | Pairs targeting promoters         | ~10/gene |
| Pairs targeting promoters + exons | ~80/gene | Pairs targeting the introns of positive control genes | 259 | Pairs targeting promoters + exons | ~10/gene |
| Total                             | 1,708    | Total                                                 | 459 | Total                             | 10,305   |
| <b>Total gRNA pairs: 12,472</b>   |          |                                                       |     |                                   |          |

**Supplementary Table 4.** Qualitative summary of pgRNA library.

| <b>Category</b>           | <b>Plasmid Library</b> | <b>Cell Library</b> |
|---------------------------|------------------------|---------------------|
| <b>Successful rate</b>    | 92.5%                  | 84.2%               |
| <b>Mutation rate</b>      | 7.5%                   | 8.3%                |
| <b>Recombination rate</b> | 0%                     | 7.5%                |

Note: gRNAs' sequences were verified for 80 and 120 randomly-picked clones from the plasmid and the cell libraries, respectively.

## Supplementary Text 1

### Algorithm for designing pgRNA barcodes

In this section, we describe the algorithm for designing barcodes for a given set of pgRNAs. Note that an intuitive approach is to randomly select one of the two gRNAs as a barcode. However, this intuitive approach may reduce the number of available pgRNAs in the library. The following figure provides an example. Here, three pgRNAs share 3 gRNAs, and a random assignment may lead to a solution with only 2 allowable pgRNAs.

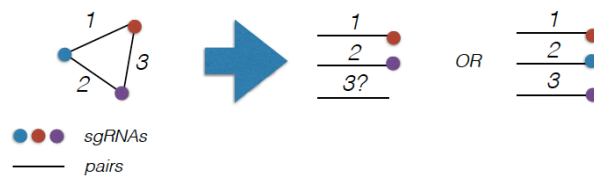

Figure 1: Randomly assigning gRNAs as barcodes may reduce the number of possible pgRNAs in the library.

We sought to develop an algorithm to design as many pgRNAs with barcodes. Here, we use a graph  $G = (V, E)$  to describe the relationships between gRNAs and pgRNAs.  $V$  (vertex) represents all possible gRNAs, and  $(v_1, v_2) \in E$  represents one pgRNA, with  $v_1$  as a barcode. We first have the following lemma.

**Theorem 1.** The maximum number of pgRNAs in  $G$  is  $|V|$ , the number of sgRNAs.

**Proof:** This is true since each gRNA can be served as barcode at most once.

We notice that, if a vertex  $v$  is used by only one pgRNA  $e$  in  $G$ , then  $v$  can be served as a barcode of  $e$  without affecting the choice of barcodes for other pgRNAs. Therefore, we develop an iterative greedy algorithm to choose the barcodes:

#### Algorithm 1. The barcode selection algorithm

**Input:** a graph  $G = (V, E)$  with  $V$  represents all possible gRNAs, and  $E$  represents all possible pgRNAs;

**Output:**  $E' = \{(v_1, v_2)\} \in E$ , where  $\{v_1\}$  are barcodes of  $E'$ .

**Procedure:**

1. Set  $E' = \{\}$ ;
2. Search for all vertices in  $V$ ; if  $v_1$  is connected by only one edge  $e = (v_1, v_2)$ , then set  $E' = E' \cup \{(v_1, v_2)\}$ , remove  $v_1$  from  $V$  and remove  $(v_1, v_2)$  from  $E$ ;

3. If all vertices in  $V$  are used by at least two edges, then randomly choose one edge  $e = (v_1, v_2)$  and randomly select one vertex (like  $v_1$ ) as the barcode of  $e$ , set  $E' = E' \cup \{(v_1, v_2)\}$ , remove  $v_1$  from  $V$  and remove  $(v_1, v_2)$  from  $E$ ;
4. Go to step 2 until  $V = \{\}$ .

We now show that this algorithm can indeed select the maximum number of pgRNAs ( $|V|$ ).

**Theorem 2.** Algorithm 1 can select  $|V|$  pgRNAs with barcode for a given graph  $G = (V, E)$ .

**Proof:** We prove this theorem using induction on  $n = |V|$ . Theorem 2 is obviously true for a simple case of  $n = 2$ , where two gRNAs can be served as barcodes for two pgRNAs.

Suppose the algorithm is true for  $|V| = n - 1$ . Given graph  $G = (V, E)$  with  $|V| = n$ , we have the following scenarios:

1.  $G$  includes a vertex  $v_1$  that are connected by only one edge  $e = (v_1, v_2)$ . In this case, Algorithm 1 will include  $(v_1, v_2) \in E'$ , and generate a subgraph  $G_{n-1} = (V_{n-1}, E_{n-1})$ . Note that  $G_{n-1}$  has  $n - 1$  vertices; therefore, Algorithm 1 can generate a barcode solution  $E'_{n-1}$  with  $n - 1$  pairs.  $E' = E'_{n-1} \cup e$  is thus a barcode solution with size  $n$ , as  $v_1$  is not included in  $G_{n-1}$ .
2. All vertices are connected by at least two edges. Similar to the first scenario, Algorithm 1 will randomly choose an edge  $e = (v_1, v_2)$ , and generate an optimal solution  $E'_{n-1}$  for the subgraph  $G_{n-1}$  without the vertex  $v_1$ . Therefore,  $E' = E'_{n-1} \cup e$  is also a barcode solution with size  $n$ .

In practice, the number of sgRNAs is more than the desired number of pgRNAs in the design (e.g., 10 pairs for lncRNA promoters and 10 pairs for lncRNA promoters/exons). We therefore run Algorithm 1 until a desired number of pairs is met for each lncRNA or gene.

## Supplementary Text 2

### The full sequence of the paired sgRNA cassette

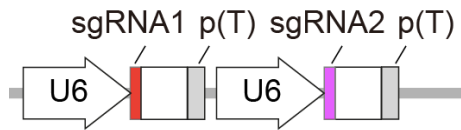

TCTAGAGGTACCAAGGTCTGGCAGGAAGAGGGCCTATTTCCCATGATTCCTTCATATT  
 TGCATATACGATACAAGGCTGTTAGAGAGATAATTAGAATTAATTTGACTGTAAACACA  
 AAGATATTAGTACAAAATACGTGACGTAGAAAGTAATAATTTCTTGGGTAGTTTGCAGT  
 TTTAAAATTATGTTTTAAAATGGACTATCATATGCTTACCGTAACTTGAAAGTATTTCGA  
 TTTCTTGGCTTTATATATCTTGTGGAAAGGACGAAACACCGNNNNNNNNNNNNNNNN  
 NNNNGTTTAAGAGCTATGCTGGAAACAGCATAGCAAGTTTAAATAAGGCTAGTCCGTT  
 ATCAACTTGAAAAAGTGGCACCGAGTCGGTGCTTTTTTTTTCCCGTATCTCACGCTCTT  
 CATCGGCGTCTAGAGGTACCAAGGTCTGGCAGGAAGAGGGCCTATTTCCCATGATTC  
 CTTTCATATTTGCATATACGATACAAGGCTGTTAGAGAGATAATTAGAATTAATTTGACT  
 GTAAACACAAAGATATTAGTACAAAATACGTGACGTAGAAAGTAATAATTTCTTGGGTA  
 GTTTGCAGTTTTTAAAATTATGTTTTAAAATGGACTATCATATGCTTACCGTAACTTGAAA  
 GTATTTCGATTTCTTGGCTTTATATATCTTGTGGAAAGGACGAAACACCGNNNNNNNN  
 NNNNNNNNNNNNGTTTAAGAGCTATGCTGGAAACAGCATAGCAAGTTTAAATAAGGC  
 TAGTCCGTTATCAACTTGAAAAAGTGGCACCGAGTCGGTGCTTTTTTTT
